# Supplementary material
Source: PubMed Central journal article supplement (PMC4149605)

A.

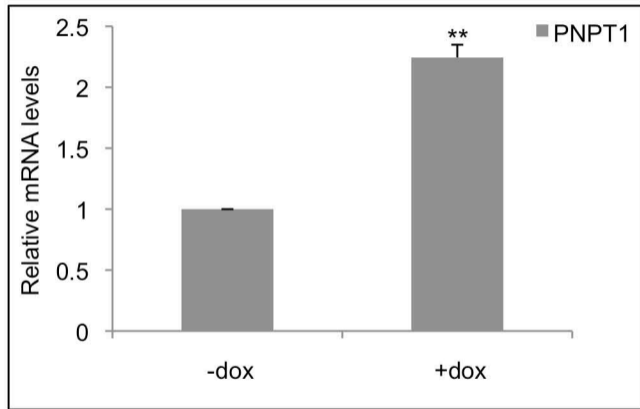

\*\*p < 0.01

B.

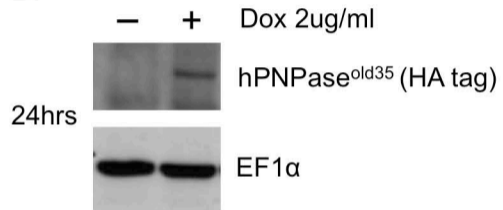

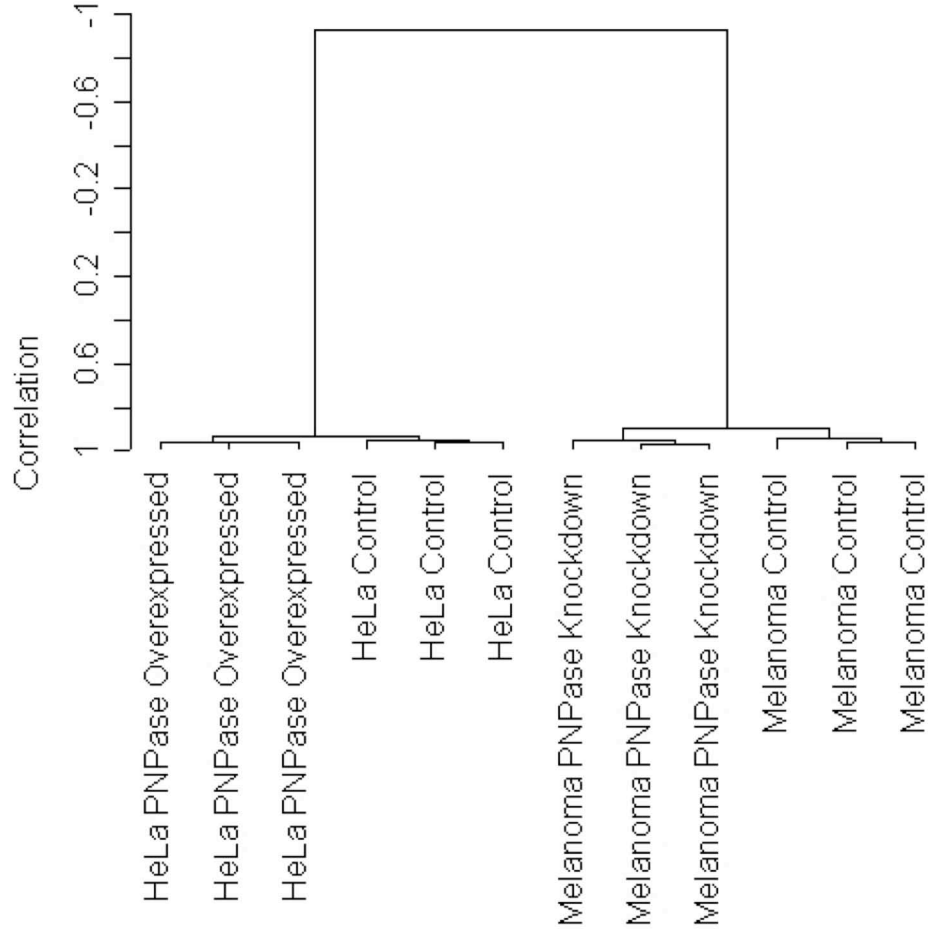



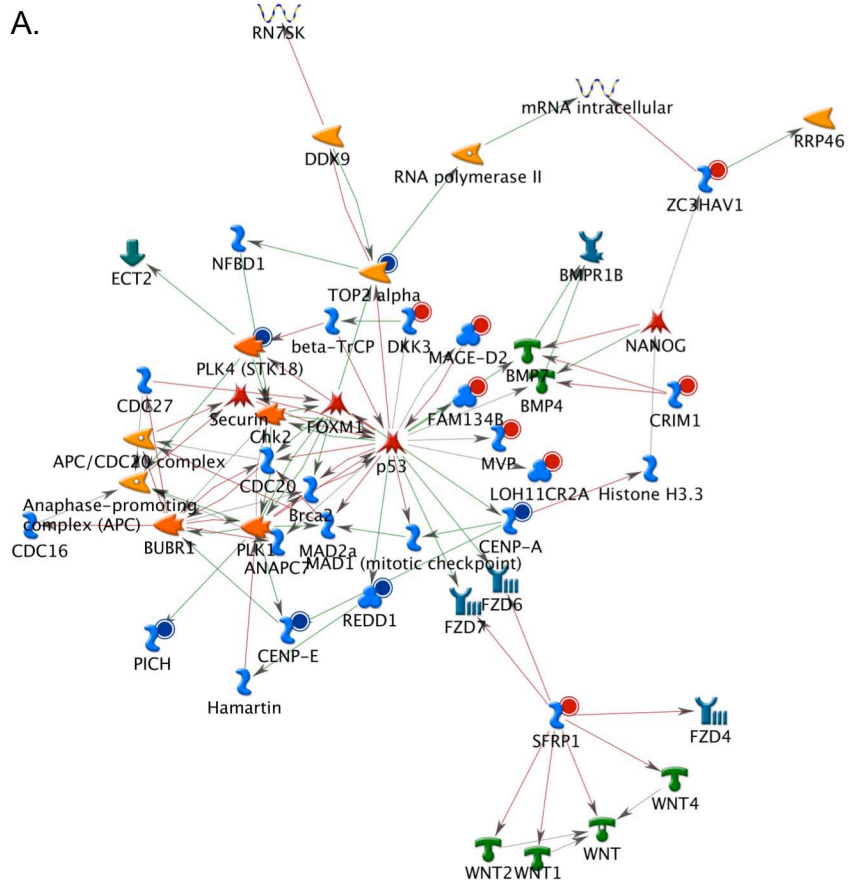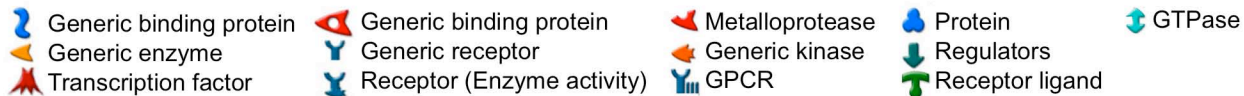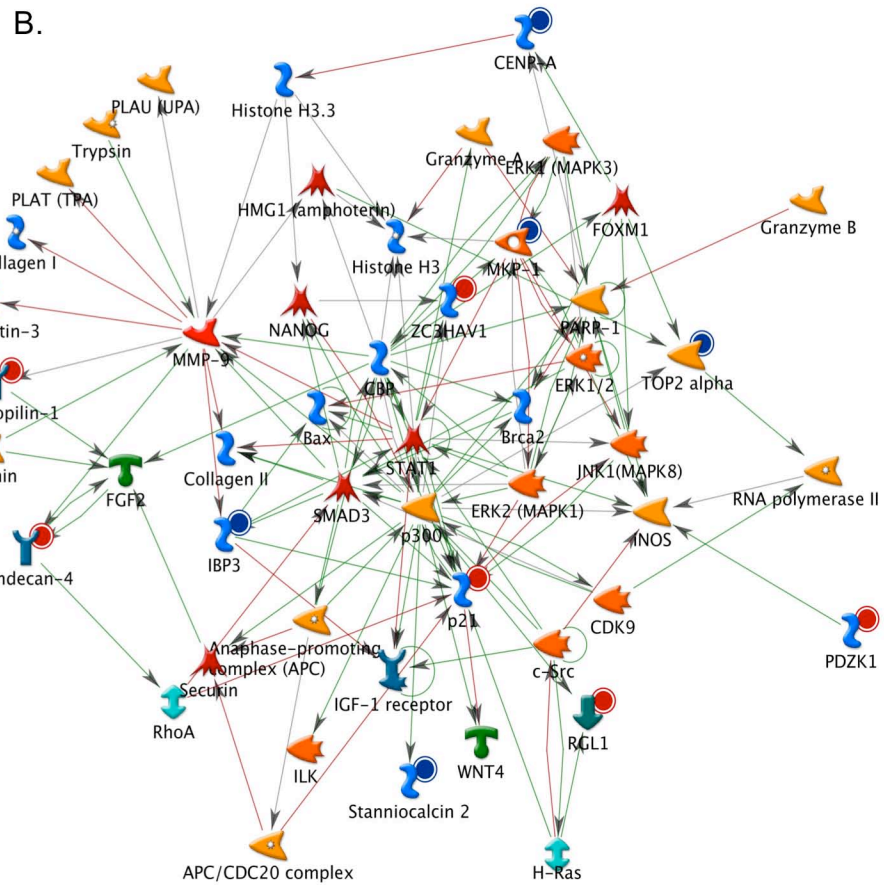

# TCGA PANCAN dataset

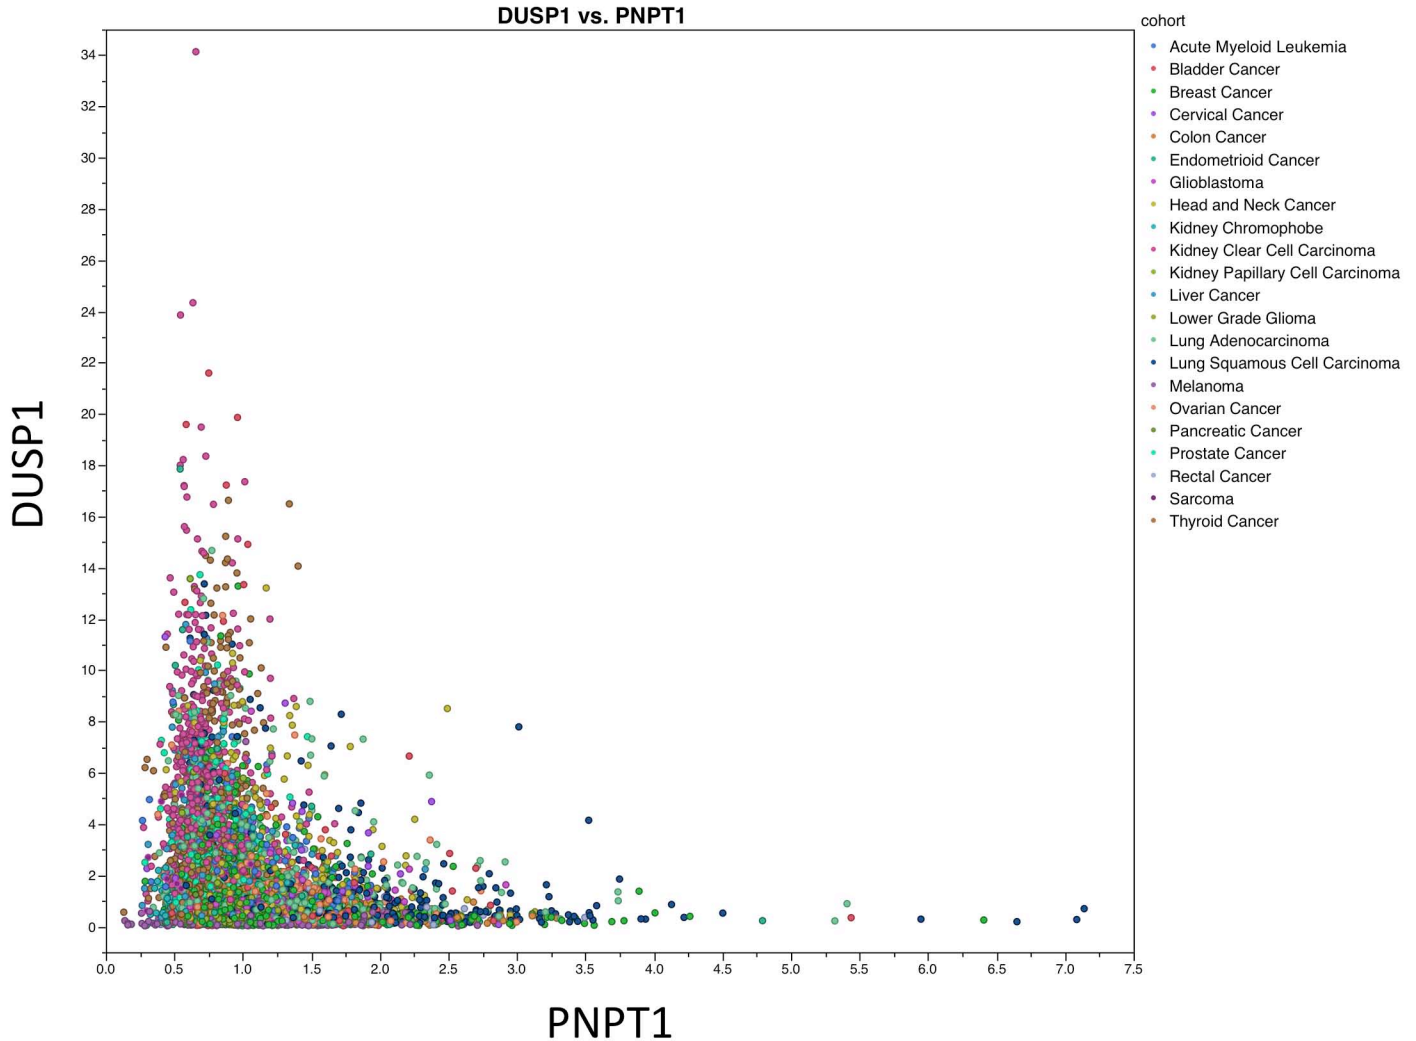

A.

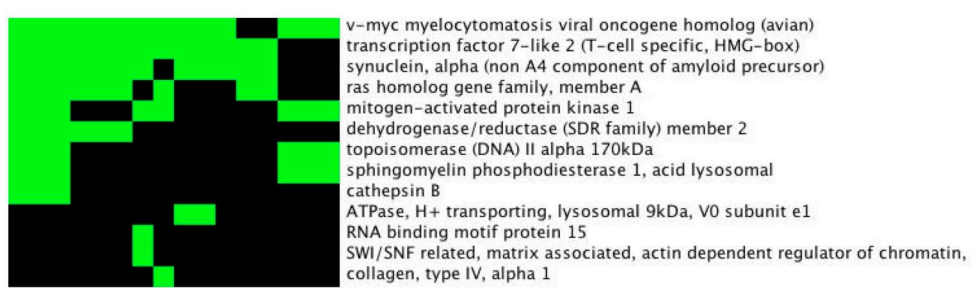

GO:0043065--positive regulation of apoptosis  
GO:0010942--positive regulation of cell death  
GO:003098--positive regulation of programmed cell death  
GO:0003311--regulation of cellular localization  
GO:0051030--positive process  
GO:0006916--homeostatic process  
GO:0048818--chemical homeostasis  
GO:0043065--positive regulation of macromolecule  
GO:0043065--positive regulation of apoptosis  
GO:0043065--negative regulation of cell death  
GO:0043065--negative regulation of programmed cell death  
GO:0043067--regulation of programmed cell death  
GO:0010941--regulation of cell death

Apoptosis

B.

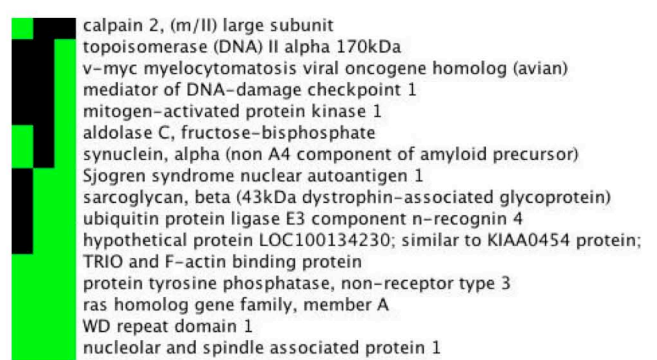

GO:0005856--cytoskeleton  
cytoskeleton  
GO:0008092--cytoskeletal protein binding

Cytoskeleton

C.

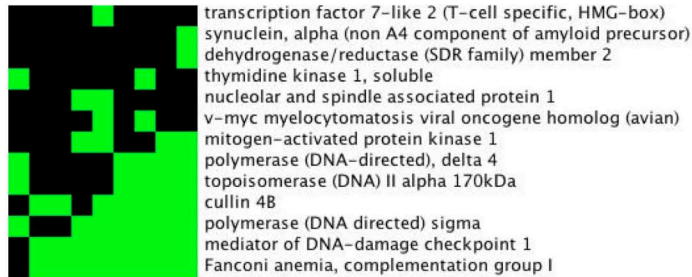

GO:0033514--cellular response to stress  
GO:0006974--response to DNA damage stimulus  
GO:0006239--DNA metabolic process  
GO:0006281--DNA repair  
GO:0007049--cell cycle  
GO:0006260--DNA replication  
DNA repair  
DNA damage  
cell cycle

DNA Repair

D.

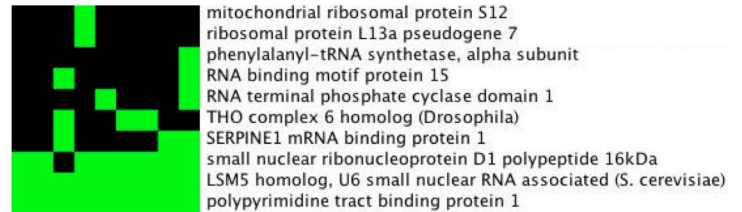

GO:003723--RNA binding  
GO:0016071--mRNA metabolic process  
GO:0003723--RNA binding  
GO:0006396--RNA processing  
GO:0030529--ribonucleoprotein complex  
GO:0006397--mRNA processing  
GO:0006397--mRNA splicing  
GO:0008380--RNA splicing

mRNA processing



A.

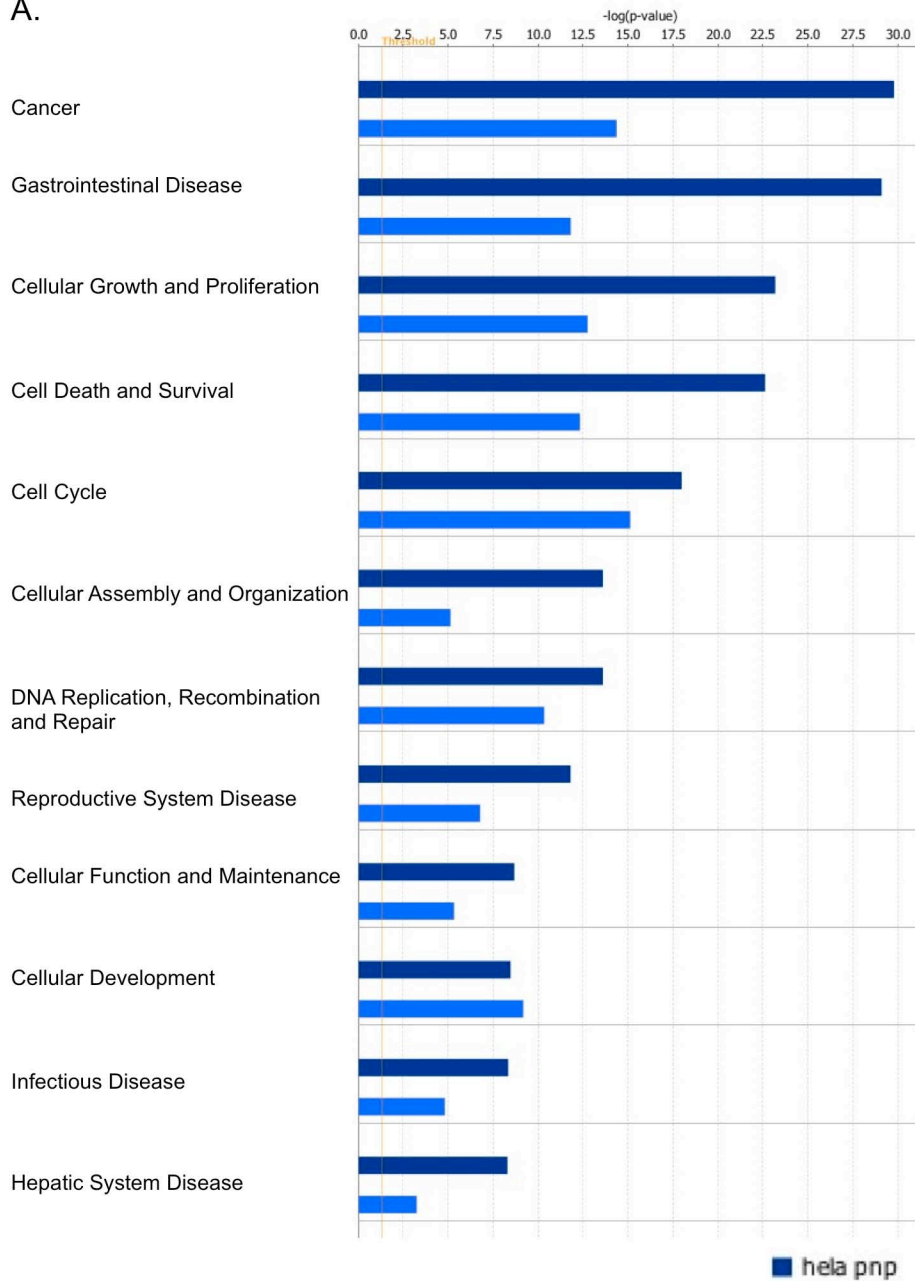

B.

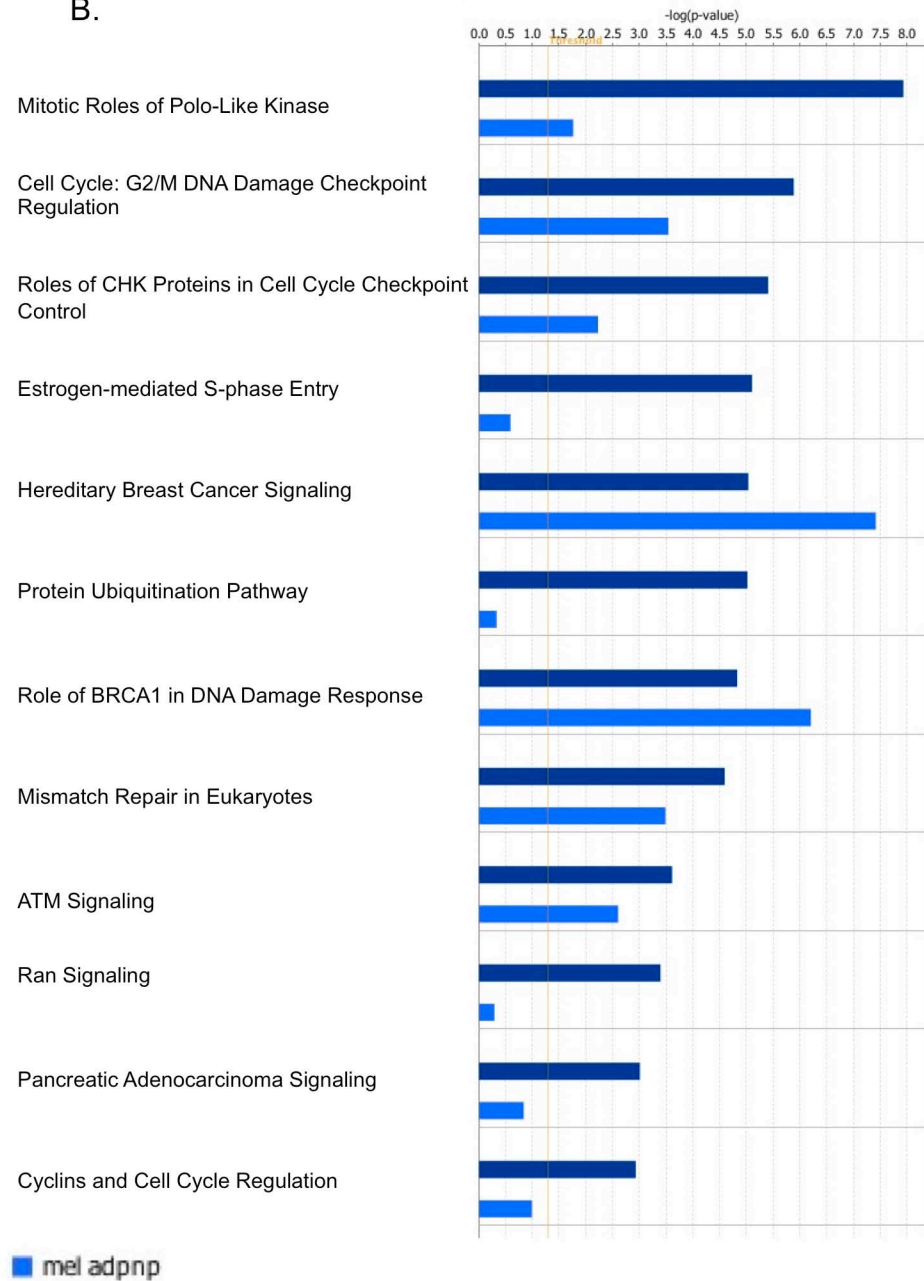

Supplement: NIHMS596926-supplement-Supp_FigureS1-S7.pdf [file NIHMS596926-supplement-Supp_FigureS1-S7.pdf]
